**Table S3. Composition of the CNN Test set.** NPDR: Non-proliferative DR.

| CNN Test Set               |                   |                   |                   |
|----------------------------|-------------------|-------------------|-------------------|
|                            | Female            | Male              | Total             |
| N                          | 224               | 224               | 448               |
| Age (M $\pm$ SD)           | 53.43 $\pm$ 10.04 | 50.89 $\pm$ 11.15 | 52.16 $\pm$ 10.69 |
| Ethnicity (N)              |                   |                   |                   |
| Latin American             | 168               | 148               | 316               |
| Caucasian                  | 20                | 41                | 61                |
| Multi-racial               | 13                | 9                 | 22                |
| Asian                      | 4                 | 8                 | 12                |
| African Descent            | 6                 | 9                 | 15                |
| Other                      | 7                 | 5                 | 12                |
| Native American            | 3                 | 4                 | 7                 |
| Indian Subcontinent Origin | 3                 | 0                 | 3                 |
| Severity of DR (N)         |                   |                   |                   |
| Moderate NPDR              | 102               | 122               | 224               |
| Mild NPDR                  | 105               | 88                | 193               |
| Severe NPDR                | 11                | 8                 | 19                |
| Proliferative NPDR         | 6                 | 6                 | 12                |
| HbA1c (M $\pm$ SD)         | 8.77 $\pm$ 1.99   | 8.79 $\pm$ 2.11   | 8.78 $\pm$ 2.05   |
